# Supplementary material
Source: PubMed Central journal article supplement (PMC489978)

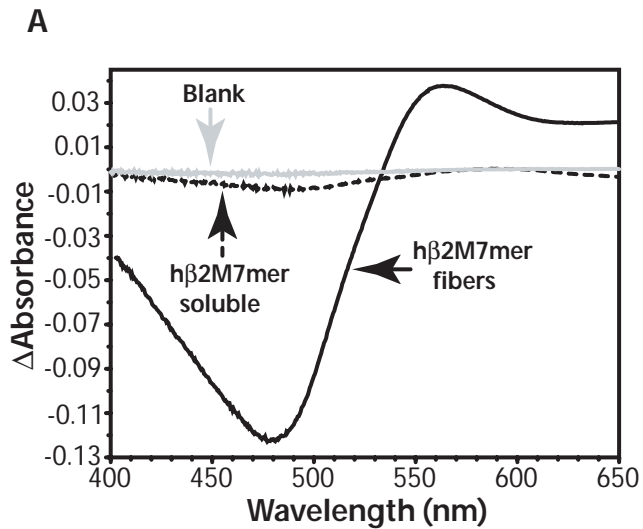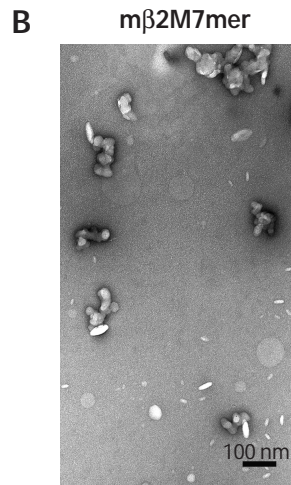

Supplement: pnas_101_29_10584__2.pdf [file pnas_101_29_10584__2.pdf]

**A**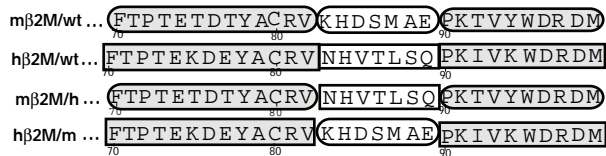**B**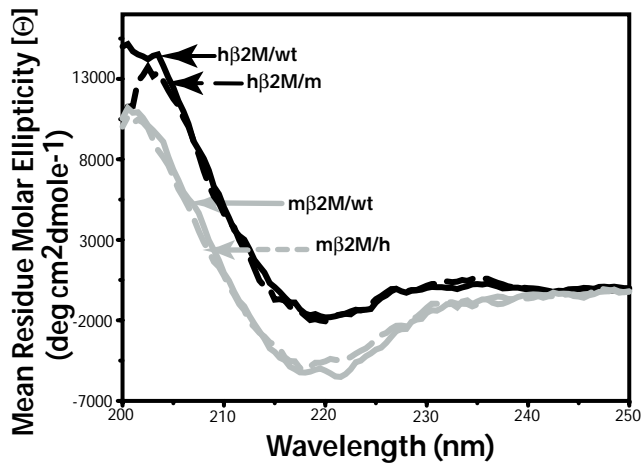

Supplement: pnas_101_29_10584__3.pdf [file pnas_101_29_10584__3.pdf]
